1 **Enhancing the efficacy of neonicotinoids against mosquitoes and overcoming resistance**  
2 **issues**

3 Fred A. Ashu<sup>1,2</sup>, Caroline Fouet<sup>3</sup>, Marilene M. Ambadiang<sup>1,2</sup>, Véronique Penlap-Beng<sup>2</sup>, and  
4 Colince Kamdem<sup>3\*</sup>

5 <sup>1</sup>*Centre for Research in Infectious Diseases, P.O. Box 13591, Yaoundé, 9 Cameroon*

6 <sup>2</sup>*Department of Biochemistry, Faculty of Science, University of Yaoundé I, P.O. Box 11 812,*  
7 *Yaoundé, Cameroon*

8 <sup>3</sup>*Department of Biological Sciences, The University of Texas at El Paso, 500 W. University*  
9 *Ave. El Paso, TX 79968, USA*

10 \*correspondence: [gckamdmdjo@utep.edu](mailto:gckamdmdjo@utep.edu)

11 **Background:** Neonicotinoids are potential alternatives for targeting pyrethroid-resistant  
12 mosquitoes, but their efficacy against malaria vector populations of Sub-Saharan Africa has  
13 yet to be investigated. Here we tested and compared the efficacy of four neonicotinoids alone  
14 or in combination with a synergist against two major vectors of *Plasmodium*.

15 **Results:** Using standard bioassays, we first assessed the lethal toxicity of three active  
16 ingredients against adults of two susceptible *Anopheles* strains and we determined  
17 discriminating doses for monitoring susceptibility in wild populations. We then tested the  
18 susceptibility of 5532 *Anopheles* mosquitoes collected from urban and rural areas of Yaoundé,  
19 Cameroon, to discriminating doses of acetamiprid, imidacloprid, clothianidin and  
20 thiamethoxam. We found that in comparison with some public health insecticides,  
21 neonicotinoids have high lethal concentration, LC<sub>99</sub>, reflecting their low toxicity to *Anopheles*  
22 mosquitoes. In addition to this reduced toxicity, resistance to the four neonicotinoids tested  
23 was detected in *An. gambiae* populations collected from agricultural areas where larvae are

24 intensively exposed to crop-protection neonicotinoids. However, adults of another major  
25 vector that occurred in urbanized settings, *An. coluzzii*, were fully susceptible to  
26 neonicotinoids except acetamiprid for which 80% mortality was obtained within 72 h of  
27 insecticide exposure. Importantly, the cytochrome inhibitor, piperonyl butoxide (PBO), was  
28 very effective in enhancing the activity of clothianidin and acetamiprid providing  
29 opportunities to create potent neonicotinoid formulations against *Anopheles*.

30 **Conclusion:** These findings suggest that to successfully repurpose agricultural neonicotinoids  
31 for malaria vector control, it is essential to use formulations containing synergists such as  
32 PBO or surfactants to ensure optimal efficacy.

33 **Key words:** insecticide, pest management, resistance, pesticide, crop.

## 34 1. Introduction

35 The scale up of vector control has been instrumental to the reduction of malaria burden over  
36 the last two decades in Sub-Saharan Africa <sup>1</sup>. Long-lasting insecticidal nets and indoor  
37 residual spraying constitute the core vector control interventions and rely on the use of  
38 chemical insecticides from 6 classes: pyrethroids, carbamates, organophosphates,  
39 organochlorines, neonicotinoids and pyrroles <sup>2</sup>. Prior to the recent approval of a neonicotinoid  
40 and a pyrrole by the World Health Organization (WHO), neurotoxic insecticides that disrupt a  
41 sodium channel or inhibit acetylcholinesterase in the insect's nervous system were widely  
42 applied. The similarity of modes of action combined with intensive use of a limited number of  
43 active ingredients has created ideal conditions for the emergence and spread of resistance <sup>3,4</sup>.  
44 Indeed, insecticide resistance in malaria vector species has been reported against all the  
45 classes of neurotoxic insecticides, posing a challenge to the sustainability of vector control  
46 interventions <sup>5,6</sup>. As a result, the search for new insecticides has become an urgent necessity  
47 <sup>7,8</sup>. In the quest for new active ingredients, alternatives to sodium channel and

48 acetylcholinesterase inhibitors have drawn considerable attention because their new modes of  
49 action are more suited to target populations that are currently resistant to insecticides in use in  
50 intervention measures <sup>9–11</sup>.

51 Two formulations of clothianidin, a neonicotinoid repurposed from the agricultural sector,  
52 have been prequalified for indoor residual spraying <sup>2</sup>. Clothianidin is the unique active  
53 ingredient in SumiShield® (Sumitomo Chemical Company, Japan) and is combined with  
54 deltamethrin, a pyrethroid, in Fludora Fusion® (Bayer CropScience, Monheim, Germany) <sup>12–</sup>  
55 <sup>14</sup>. Neonicotinoids act as agonist of acetylcholine, selectively target the insect nicotinic  
56 acetylcholine receptor (nAChR) and disrupt excitatory cholinergic neurotransmission leading  
57 to paralysis and death <sup>15</sup>. Neonicotinoids are intensively used in agriculture and represented  
58 more than 25% of the global insecticide sales share in 2014 <sup>16</sup>. In some Sub-Saharan African  
59 countries, between 100 and 200 formulations of thiacloprid, imidacloprid, acetamiprid and  
60 thiamethoxam are freely used for agricultural pest management <sup>17–19</sup>. Neonicotinoids sprayed  
61 to protect crops from insect pests are highly water-soluble and are prone to leach in aquatic  
62 habitats that support *Anopheles* larvae in farms <sup>20,21</sup>. This unintentional exposure may  
63 contribute to the development of broad-spectrum neonicotinoid resistance <sup>22–25</sup>. Thus, in  
64 prospective areas where clothianidin formulations may be used, it is important to assess  
65 baseline susceptibility of vector populations to a wide range of neonicotinoid insecticides.  
66 Moreover, bioassays have suggested that other agrochemicals such as thiamethoxam,  
67 imidacloprid, and acetamiprid may have satisfactory activity against malaria vectors, but their  
68 efficacy on wild populations has yet to be evaluated <sup>8</sup>.

69 The present study aimed to test the efficacy of four agrochemicals with or without synergists  
70 against malaria mosquitoes. We first evaluated the lethal toxicity of active ingredients and we  
71 then compared the susceptibility of wild female adults of two important malaria vector  
72 species: *An. coluzzii* and *An. gambiae*. To determine the environmental drivers underlying

73 susceptibility variation within species, we tested several populations from agricultural, rural  
74 and urban areas in the equatorial forest of Cameroon. We found that *An. coluzzii* from urban  
75 areas is globally susceptible to neonicotinoids while *An. gambiae* is highly tolerant,  
76 particularly populations from farming areas. We concluded that neonicotinoid formulations  
77 containing adjuvants such as surfactants or other synergists are needed to reach the desired  
78 level of efficacy against malaria mosquitoes.

## 79 **2. Materials and methods**

### 80 **2.1 Lethal concentrations determination**

81 Center for Disease Control and prevention (CDC) bottle bioassays were used to assess the  
82 lethal toxicity of neonicotinoids <sup>26</sup>. We focused on four active ingredients: acetamiprid,  
83 imidacloprid, thiamethoxam and clothianidin. Acetamiprid, imidacloprid and thiamethoxam  
84 are commonly used by farmers in Cameroon to protect several types of crops from insect  
85 pests <sup>19,27</sup>. Clothianidin is an agrochemical, which is not registered in Cameroon, but whose  
86 formulations have been approved for malaria mosquito control <sup>2</sup>. All four neonicotinoids  
87 tested were technical grade material obtained from Sigma Aldrich Pestanal<sup>®</sup>. These  
88 insecticides were dissolved in absolute ethanol except imidacloprid for which acetone was  
89 used. A range of concentrations of the active ingredient was tested against one susceptible  
90 colony (*An. gambiae* Kisumu or *An. coluzzii* Ngousso) in order to determine LC<sub>50</sub> and LC<sub>99</sub>  
91 corresponding to the lowest concentrations required to kill respectively 50% and 99% of  
92 susceptible mosquitoes. After 1 h exposure to the insecticide, lethal concentrations were  
93 determined within 24 h and 72 h. By contrast to clothianidin whose toxicity has been tested  
94 with at least one susceptible strain <sup>7,11,28,29</sup>, there is no information on the lethal concentrations  
95 of acetamiprid, imidacloprid and thiamethoxam to African malaria mosquitoes. Therefore, we  
96 focused primarily on those three active ingredients. The following gradients were tested for

97 each insecticide: imidacloprid (12.5, 50, 100, 200, 250 µg/ml); acetamiprid (12.5, 25, 50, 75,  
98 150 µg/ml); thiamethoxam (3, 50, 150, 250, 300 µg/ml).

99 250-ml Wheaton bottles were coated with 1 ml of a given concentration of the insecticide and  
100 25 female adult mosquitoes, 3 to 5 days old, were exposed for 1 h in the bottles. After the  
101 exposure period, mosquitoes were removed from the bottles and released into net-covered  
102 paper cups on top of which cotton imbibed with 10% sugar solution was placed. Mortality  
103 was observed after 24 h and 72 h. Bioassays were performed under a controlled environment  
104 of 25–27°C, 70–90% relative humidity and a 12:12 h light/dark photoperiod. Four replicates  
105 were tested per concentration together with two controls where mosquitoes were exposed to 1  
106 ml of solvent, ethanol or acetone.

## 107 **2.2 Susceptibility evaluation in wild populations**

108 Wild *An. gambiae sensu lato (s.l.)* mosquito populations were collected from several field  
109 surveys and cumulatively tested between September 2019 and September 2022. Approval to  
110 conduct a study in the Center region (N°: 1-140/L/MINSANTE/SG/RDPH-Ce), ethical  
111 clearance (N°: 1-141/CRERSH/2020) and research permit (N°:  
112 000133/MINRESI/B00/C00/C10/C13) were granted by the ministry of public health and the  
113 ministry of scientific research and innovation of Cameroon. Mosquitoes were sampled using a  
114 dipper from breeding sites identified in eleven locations around Yaoundé. Three locations  
115 surveyed within the city were densely urbanized (Tsinga, Combattant, Etoa Meki), while eight  
116 sampling sites were located in suburban and rural areas (Figure 1). One of the sites  
117 (Nkolondom) was situated in a suburban neighborhood where swampy areas are suitable for  
118 intensive cultivation of food crops (Figure 1).

119 Larvae collected from the field were transported in plastic containers to the insectary where  
120 they were reared in trays containing 200 ml borehole water. Larvae were given TetraMin®  
121 fish food daily, and adults that emerged were maintained in 30 cm-by-30 cm cages and

122 provided with 10% sugar solution. Female adults were tested to assess their level of  
123 susceptibility to neonicotinoids using bottle bioassays and a discriminating concentration of  
124 the insecticide. A discriminating concentration was defined as the lowest concentration  
125 required to kill 100% of susceptible mosquitoes in all four replicates and was chosen within  
126 the confidence intervals of LC<sub>99</sub> for acetamiprid, imidacloprid and thiamethoxam. The  
127 discriminating concentration of clothianidin was obtained from <sup>28</sup>. Two cryptic species of the  
128 *An. gambiae* complex: *An. gambiae sensu stricto* (hereafter *An. gambiae*) and *An. coluzzii* are  
129 found segregating along an urbanization gradient across the study sites <sup>30</sup>. The two species  
130 were identified from a subset of 50 mosquitoes from each sampling site using a diagnostic  
131 PCR method described in <sup>31</sup>.

### 132 **2.3 Synergistic effect of Piperonyl butoxide (PBO)**

133 A bioassay was performed to determine if the synergistic effect of the cytochrome P450  
134 inhibitor, piperonyl butoxide (PBO) could restore neonicotinoid susceptibility. Mosquitoes  
135 that emerged from the same pool of larvae were first exposed to PBO at 4% in CDC bottles,  
136 for 1 h before being released into other bottles coated with the neonicotinoid insecticide as  
137 described in <sup>23</sup>. Mortality values obtained with or without prior exposure to the synergist were  
138 compared after 72 h of holding period.

### 139 **2.4 Data analysis**

140 Summing the number of dead mosquitoes and expressing this as a percentage of the total  
141 number of individuals exposed across all four bottles provided an estimate of the mortality  
142 rate per test. Abbott's formula was used to correct mortality rates when 5%–10% of  
143 individuals died in the corresponding control tests <sup>32</sup>. Average mortality for each insecticide  
144 dose and a log-logistic model were used to fit the dose-response curve with the *drc* package in  
145 R version 4.2.2 <sup>33</sup>. A probit model was applied to determine LC<sub>50</sub> and LC<sub>99</sub> plus their 95%

146 confidence intervals for each insecticide using the *ecotox* package in R. Mortality in wild  
147 populations was interpreted based on the WHO criteria which states that 98%–100% mortality  
148 indicates susceptibility, 90%–97% mortality suggests the possibility of resistance that needs  
149 to be confirmed and less than 90% mortality corresponds to resistance <sup>34</sup>.

### 150 **3. Results**

#### 151 **3.1 Lethal toxicity of neonicotinoids to *Anopheles***

152 The short-term lethal toxicity of three neonicotinoids against *Anopheles* mosquitoes was  
153 tested with dose-response bioassays using four replicates per dose of insecticide. Results of  
154 LC<sub>50</sub> and LC<sub>99</sub> of acetamiprid, thiamethoxam and imidacloprid are presented in Table 1 and  
155 Figure 2 showing the dose-response curves with mortality recorded within 24 h and 72 h of  
156 exposure. 24-h LC<sub>99</sub> obtained with the susceptible strain *An. gambiae* Kisumu were 69.0  
157 µg/ml, confidence interval (CI)<sub>95%</sub> [54.40, 98.1], for acetamiprid compared to 152.0 µg/ml  
158 [112.0, 235.1] for imidacloprid. Meanwhile, 24-h lethal concentrations of thiamethoxam  
159 determined with the susceptible strain *An. coluzzii* Ngousso were LC<sub>50</sub>: 9.6 µg/ml [6.8, 13.5]  
160 and LC<sub>99</sub>: 133.0 µg/ml [79.4, 277.0], respectively. When toxicity is high, lethal concentrations  
161 are low since smaller doses of insecticide are required to kill a given number of exposed  
162 individuals. Based on the lowest LC<sub>50</sub>, thiamethoxam (LC<sub>50</sub>: 9.6 µg/ml [6.8, 13.5]) was the  
163 most toxic neonicotinoid to *Anopheles* mosquitoes in 24 h followed by acetamiprid (LC<sub>50</sub>:  
164 13.6 µg/ml [11.5, 15.5]) and imidacloprid (LC<sub>50</sub>: 18.6 µg/ml [15.2, 20.0]). To compare lethal  
165 toxicity within 24 h and 72 h, we used the 95% confidence intervals. The mortality response  
166 of populations was considered different between 24 h and 72 h if there was no overlap  
167 between their corresponding 95% confidence limits. Confidence intervals of LC<sub>50</sub> and LC<sub>99</sub> at  
168 24 h and 72 h overlapped for the three active ingredients tested, which suggested that  
169 extending the holding period did not increase toxicity (Table 1).

#### 170 **3.2 Variation in susceptibility within and between species**

171 To evaluate the baseline susceptibility of wild populations to acetamiprid, imidacloprid, and  
172 thiamethoxam, we chose discriminating concentrations of 75 µg/ml, 200 µg/ml and 250  
173 µg/ml, respectively. The doses were picked up within the 95% confidence intervals for 24-h  
174 LC<sub>99</sub> in order to balance the risk of not detecting low-level resistance while limiting the risk of  
175 reporting false positives. The doses of acetamiprid and imidacloprid we chose were recently  
176 used to assess the susceptibility of wild *An. coluzzii* populations and have revealed  
177 satisfactory discriminative power <sup>22</sup>. In addition to acetamiprid, imidacloprid and  
178 thiamethoxam, we tested a fourth neonicotinoid (clothianidin) using a discriminating  
179 concentration of 150 µg/ml as determined in an earlier study <sup>28</sup>. We first confirmed the  
180 efficacy of the discriminating concentrations against the insecticide susceptible strains *An.*  
181 *gambiae* Kisumu and *An. coluzzii* Ngousso. For both laboratory colonies, 100% of female  
182 adults exposed to the discriminating dose of each of the four neonicotinoids died within 24 h.  
183 The baseline susceptibility of the two major vectors *An. gambiae* and *An. coluzzii* to  
184 acetamiprid, imidacloprid and thiamethoxam was determined from populations tested from  
185 2020 to 2022. Susceptibility to clothianidin was estimated by pooling original data obtained  
186 from bioassays carried out between 2020 and 2022 with data presented in <sup>23</sup>, which originated  
187 from field collections conducted from 2019 to 2020. In total, 5532 female mosquitoes  
188 belonging to eleven populations were tested with bioassays from 2019 to 2022.  
189 We first analyzed bioassay results from individual collection sites. We observed that  
190 populations collected from three sites situated in urbanized areas were 100% *An. coluzzii* and  
191 were susceptible to neonicotinoids except acetamiprid for which signs of reduced  
192 susceptibility were apparent (Figure 3). 100% mortality was observed within 24 h or 72 h  
193 holding period upon exposure to thiamethoxam, imidacloprid and clothianidin. Meanwhile,  
194 average 72-h mortality to acetamiprid was 80% in *An. coluzzii* collected from the urban  
195 neighborhoods. Across two sites located in the suburban area (Nkolkoumou and Soa), the



196 relative frequencies of *An. gambiae* and *An. coluzzii* were ~80% and 20%, respectively.  
197 Nkolnkoumou mosquito populations were susceptible to imidacloprid and clothianidin and  
198 resistant to thiamethoxam and acetamiprid. Soa samples were tested only with clothianidin  
199 and were susceptible. None of the populations from typical *An. gambiae* habitats (rural areas)  
200 was susceptible to acetamiprid or clothianidin. Populations from the agricultural site  
201 Nkolondom were the least susceptible to neonicotinoids, with mortality rates below 50% for  
202 acetamiprid and clothianidin. It was also the only site where resistance to all four  
203 neonicotinoids was detected.

204 We then pooled results from all the bioassay tests carried out over a four-year monitoring  
205 period and we compared susceptibility profiles between urban, rural and agricultural areas. It  
206 appeared that *An. gambiae* population collected from farms were the most tolerant and that  
207 agricultural pest management is likely spreading neonicotinoid resistance among neighboring  
208 rural populations (Figure 3). Results from the two suburban sites harboring 80% *An. gambiae*  
209 were pooled with those of six locations that were typically rural and contained 100% *An.*  
210 *gambiae*. While thiamethoxam was the most toxic to *Anopheles* mosquitoes based on the  
211 lowest LC<sub>50</sub>, imidacloprid was the most effective considering mortality induced in wild  
212 populations. Clothianidin, which is neither an agricultural nor a public health insecticide in  
213 Cameroon induced low mortality in *An. gambiae* populations from rural and agricultural  
214 areas, which suggests that locally used neonicotinoids or other mechanisms are conferring  
215 cross-resistance to clothianidin.

### 216 **3.3 Synergistic effect of piperonyl butoxide (PBO)**

217 Adjuvants such as vegetable oil surfactants drastically enhance the potency of neonicotinoids  
218 against *Anopheles* mosquitoes<sup>25</sup>. Bioassays were carried out to determine if inhibition of  
219 cytochromes mediated by PBO could also improve the efficacy of some active ingredients.  
220 We tested the synergistic effect of PBO using the agricultural population that was resistant to

221 the four neonicotinoids. We also focused on clothianidin, acetamiprid and thiamethoxam  
222 because mortality rates within 72 h of exposure were less than 75% allowing a more accurate  
223 evaluation of synergism<sup>34</sup>. Susceptibility was fully restored for acetamiprid (100% vs 35.55 ±  
224 5.25%) and partially restored for clothianidin in the presence of PBO (74.33 ± 3.82 vs 30.98 ±  
225 3.49, Wilcoxon rank sum test, p<0.05) after 72 h post-exposure (Figure 4). On the contrary,  
226 pre-exposure to PBO did not significantly affect susceptibility to thiamethoxam (58.0% ± 8.2  
227 vs 71.5% ± 7.7, Wilcoxon rank sum test, p>0.05).

## 228 **Discussion**

229 Most insecticides used in mosquito control come from the agricultural sector<sup>4</sup>. A new  
230 generation of active ingredients are being tested to control anopheline mosquitoes that have  
231 become highly resistant to existing vector control insecticides<sup>7,8</sup>.

232 In the present study, we focused on neonicotinoids, a class of insecticides including  
233 clothianidin whose formulations are proposed for indoor residual spraying<sup>12-14</sup>. We first  
234 determined the lethal concentrations of three different neonicotinoids using two susceptible  
235 laboratory colonies. 24-h lethal concentration (LC<sub>99</sub>) indicated that acetamiprid is the most  
236 toxic neonicotinoid to anopheline mosquitoes as it had the lowest LC<sub>99</sub>, followed by  
237 clothianidin<sup>28</sup>. However, in comparison with some public health insecticides, the  
238 neonicotinoids we tested had substantially lower toxicity based on LC<sub>99</sub> values. For example,  
239 24-h LC<sub>99</sub> of the pyrethroid, deltamethrin, to *Anopheles* is approximately 7-fold lower than  
240 that of the most potent neonicotinoid, acetamiprid<sup>26</sup>. A large-scale screening conducted to  
241 search for candidate pesticides that could be used for malaria vector control revealed that  
242 three neonicotinoids were among the least active insecticides against adults of *Aedes aegypti*  
243 and *Anopheles stephensi* in a list of nearly 100 compounds tested<sup>8</sup>. LC<sub>80</sub> of > 200 µg/ml was  
244 obtained in 24 h when an insecticide-susceptible strain of *An. stephensi* was exposed to  
245 imidacloprid or thiamethoxam while LC<sub>80</sub> for acetamiprid was ~20 µg/ml<sup>8</sup>. In the current

246 study, we also noted that extending the holding period post-exposure did not improve the  
247 toxicity of neonicotinoids as there was no significant difference between LC<sub>50</sub> and LC<sub>99</sub> at 24  
248 h and 72 h.

249 In addition to relatively low toxicity, there is also ongoing reduction in susceptibility in wild  
250 mosquito populations. Based on a 4-year monitoring and testing of adult populations from 11  
251 sites, we found contrasting patterns of baseline susceptibility to neonicotinoids between the  
252 two sibling species *An. gambiae* and *An. coluzzii*. Here we applied discriminating doses that  
253 were determined using two insecticide susceptible strains. The doses have shown sufficient  
254 discriminative power and were able to reveal gradients of tolerance to neonicotinoids in wild  
255 populations of two important vector species.

256 Our study corroborated findings from earlier surveys indicating that clothianidin resistance is  
257 emerging in *An. gambiae* despite the fact this active ingredient remains an exotic insecticide  
258 in Cameroon <sup>23,24</sup>. By contrast, it has been reported that formulations of acetamiprid and  
259 imidacloprid are intensively used for crop protection in agricultural areas in Cameroon <sup>19,23,27</sup>.  
260 As neonicotinoids are highly soluble in water, they are likely leaching in aquatic habitats in  
261 farms and are contributing to selecting for resistance in anopheline populations <sup>20,21</sup>. In line  
262 with this prediction, a study revealed that *An. gambiae* larvae collected from Nkolondom  
263 retained high fitness when reared in water containing concentrations of neonicotinoids that  
264 were lethal to susceptible strains <sup>24</sup>. The present study shows that neonicotinoid tolerance  
265 selected at larval stage induces cross-resistance to several active ingredients in female adult  
266 mosquitoes that are vectors of *Plasmodium* <sup>23-25</sup>. *An. gambiae*, which occurs in the  
267 countryside where agricultural activities are more frequent and are associated with intensive  
268 use of pesticides are developing resistance to several neonicotinoids <sup>19,27</sup>. Precisely, we noted  
269 that resistance was strongest in samples collected from the agricultural areas, where  
270 formulations of neonicotinoids were being used. *An. coluzzii* populations collected from

271 urbanized areas of Yaoundé where neonicotinoids are less or not used had sub-optimal  
272 mortality (~80%) to acetamiprid, but this species was generally susceptible to neonicotinoids.  
273 This finding was once again consistent with larval tests, which showed that third instar larvae  
274 of *An. coluzzii* from Yaoundé had low survival and barely emerged in water contaminated  
275 with neonicotinoids <sup>24</sup>. However, in Ivory Coast, reduced susceptibility to acetamiprid and  
276 imidacloprid has been reported in adults of *An. coluzzii* collected from agricultural areas  
277 suggesting that populations of this species can develop resistance if they are exposed  
278 chronically to neonicotinoid residues <sup>22</sup>.

279 Our study highlights the need for a more comprehensive survey of susceptibility to  
280 neonicotinoids in malaria vectors species, especially in prospective areas where clothianidin  
281 formulations may be used <sup>35</sup>. The vectorial system in Sub-Saharan Africa is complex and  
282 comprises at least a dozen major species that occupy diverse niches at larval and adult stages  
283 <sup>36,37</sup>. Our results show that, depending on the history of exposure to agricultural  
284 neonicotinoids, the susceptibility profile could vary significantly within and between  
285 *Anopheles* species, even on a small geographic scale. The species whose larvae are more  
286 likely to be exposed to neonicotinoids in their native ranges are *An. gambiae*, *An. coluzzii* and  
287 *An. arabiensis* as they are known to exploit man-made habitats such as temporary breeding  
288 sites created in farms <sup>38,39</sup>. These species should be the focus of extensive monitoring and  
289 efforts. *An. funestus* is a very important vector whose populations should be carefully  
290 scrutinized even if larval habitats of this species are less prone to anthropogenic disturbance  
291 <sup>40</sup>.

292 Surfactants including cleaning products such as soap have potential to synergize  
293 neonicotinoid efficacy in malaria vectors <sup>7,22,25,41</sup>. This synergism provides an opportunity to  
294 improve neonicotinoid formulations that could be used vector control. In the present study, we  
295 have revealed that PBO is another effective synergist, which offers additional options to

296 enhance neonicotinoid efficacy against *Anopheles*. We have observed that when resistant  
297 *Anopheles* mosquitoes collected from farms were pre-exposed to PBO, they became  
298 susceptible to acetamiprid suggesting that cytochrome P450 monooxygenases are involved in  
299 resistance to this insecticide. Indeed, overexpression of cytochrome P450s monooxygenases is  
300 an important mechanism underlying neonicotinoid resistance in insect pests including  
301 mosquitoes, white fly and aphids<sup>23,42,43</sup>. Gene expression analysis revealed overexpression of  
302 multiple P450 genes in an acetamiprid-resistant strain of the melon aphid, *Aphis gossypii*,  
303 indicating a role of P450-mediated detoxification in acetamiprid resistance<sup>44</sup>. Acetamiprid  
304 resistance has also been shown to depend strongly on monooxygenases in white flies and  
305 *Aedes* mosquitoes<sup>45,46</sup>. Consistent with past surveys, pre-exposure to PBO also drastically  
306 improve the efficacy of clothianidin against *Anopheles* mosquitoes<sup>23</sup>. One notable exception  
307 was thiamethoxam as PBO had little effect on baseline susceptibility of wild populations. This  
308 could be explained by the fact that thiamethoxam is a pro-insecticide which needs to be  
309 converted to clothianidin before being active in insects. This conversion is catalyzed by  
310 enzymes which might have been inhibited by PBO, leading to a slight reduction in insecticidal  
311 activity when mosquitoes were pre-exposed to PBO<sup>47</sup>.

312 In conclusion, although neonicotinoids have low acute toxicity and reduced efficacy in some  
313 *Anopheles* mosquito populations, potent formulations can still provide alternatives to control  
314 pyrethroid-resistant malaria mosquitoes. In the current study and complimentary  
315 investigations<sup>25</sup>, we have found that available synergists such as soap or PBO could be used  
316 to enhance the efficacy of neonicotinoid insecticides against *Anopheles* mosquitoes.

317 **Table 1:** Lethal concentrations, LC<sub>50</sub> and LC<sub>99</sub>, estimated at 24 h and 72 h post-exposure

| Active ingredient | Species                      | Number of mosquitoes | Holding period | LC <sub>50</sub> value (µg/L) | Lower-upper 95% confidence intervals (µg/L) | Standard error | LC <sub>99</sub> value (µg/L) | Lower-upper 95% confidence intervals (µg/L) | Standard error | Chi Square |
|-------------------|------------------------------|----------------------|----------------|-------------------------------|---------------------------------------------|----------------|-------------------------------|---------------------------------------------|----------------|------------|
| acetamiprid       | <i>An. gambiae</i> (Kisumu)  | 500                  | 24 h           | 13.6                          | 11.5 - 15.5                                 | 1.08           | 69                            | 54.4 - 98.1                                 | 1.16           | 18.1       |
|                   |                              |                      | 72 h           | 13.9                          | 11.3 - 16.2                                 | 1.07           | 64.1                          | 48.7 - 101                                  | 1.15           | 24.3       |
| imidacloprid      | <i>An. gambiae</i> (Kisumu)  | 350                  | 24 h           | 18.6                          | 15.2 - 22.0                                 | 1.1            | 152                           | 112 - 235                                   | 1.2            | 18.4       |
|                   |                              |                      | 72 h           | 17.1                          | 12.9 - 21.4                                 | 1.1            | 148                           | 100 - 273                                   | 1.21           | 22         |
| thiamethoxam      | <i>An. coluzzii</i> (Ngouso) | 475                  | 24 h           | 9.66                          | 6.78 - 13.5                                 | 1.14           | 133                           | 79.4 - 277                                  | 1.26           | 25.7       |
|                   |                              |                      | 72 h           | 7.47                          | 5.84 - 9.67                                 | 1.13           | 75.3                          | 47.8 - 142                                  | 1.31           | 13.2       |

318

### 319 **Author Contributions**

320 FA: Conceptualization, Formal analysis, Investigation, Methodology, Writing – original draft;

321 CF: Conceptualization, Formal analysis, Investigation, Methodology; MA: Investigation,

322 Methodology; VP-B, Resources, Supervision. CK: Conceptualization, Formal analysis,

323 Funding acquisition, Investigation, Project administration, Writing – review & editing.

### 324 **Funding**

325 This study was supported by a National Institutes of Health grant (R01AI150529) to C K.

326 The funders had no role in study design, data collection and analysis, decision to publish, or

327 preparation of the manuscript.

### 328 **Informed Consent Statement**

329 Not applicable.

### 330 **Data Availability Statement**

331 The data for this study have been presented within this article.

### 332 **Conflicts of Interest**

333 The authors declare no competing interests.

334

335 **References**

- 336 1 World Malaria Report 2022, World Health Organization, Geneva (2022).
- 337 2 World Health Organization, List of WHO Prequalified Vector Control Products, 2023.  
338 <https://extranet.who.int/pqweb/vector-control-products/prequalified-product-list>.
- 339 3 Ranson H and Lissenden N, Insecticide Resistance in African Anopheles Mosquitoes:  
340 A Worsening Situation that Needs Urgent Action to Maintain Malaria Control, *Trends*  
341 *Parasitol* **32**:187–196, Elsevier Ltd (2016).
- 342 4 Hemingway J, The way forward for vector control, *Science (80- )* **358**:998–999 (2017).
- 343 5 Hemingway J, Ranson H, Magill A, Kolaczinski J, Fornadel C, Gimnig J, *et al.*,  
344 Averting a malaria disaster: Will insecticide resistance derail malaria control?, *Lancet*  
345 **387**:1785–1788 (2016).
- 346 6 Strode C, Donegan S, Garner P, Enayati AA, and Hemingway J, The Impact of  
347 Pyrethroid Resistance on the Efficacy of Insecticide-Treated Bed Nets against African  
348 Anopheline Mosquitoes : Systematic Review and Meta-Analysis, *PLoS Med*  
349 **11**:e1001619 (2014).
- 350 7 Lees R, Praulins G, Davies R, Brown F, Parsons G, White A, *et al.*, A testing cascade  
351 to identify repurposed insecticides for next-generation vector control tools: Screening a  
352 panel of chemistries with novel modes of action against a malaria vector, *Gates Open*  
353 *Res* **3**:1–25 (2019).
- 354 8 Hoppé M, Hueter OF, Bywater A, Wege P, and Maienfisch P, Evaluation of  
355 Commercial Agrochemicals as New Tools for Malaria Vector Control, *Chimia (Aarau)*  
356 **70**:721–729 (2016).

- 357 9 N'Guessan R, Boko P, Akogbeto M, Yates A, and Rowland M, Chlorfenapyr : A  
358 pyrrole insecticide for the control of pyrethroid or DDT resistant *Anopheles gambiae* (  
359 Diptera : Culicidae ) mosquitoes, *Acta Trop* **102**:69–78 (2007).
- 360 10 Raghavendra K, Barik TK, Sharma P, Bhatt RM, Srivastava HC, Sreehari U, *et al.*,  
361 Chlorfenapyr : a new insecticide with novel mode of action can control pyrethroid  
362 resistant malaria vectors, *Malar J* **10**:doi:10.1186/1475-2875-10-16 (2011).
- 363 11 Dagg K, Irish S, Wiegand RE, Shililu J, Yewhalaw D, and Messenger LA, Evaluation  
364 of toxicity of clothianidin ( neonicotinoid ) and chlorfenapyr ( pyrrole ) insecticides and  
365 cross-resistance to other public health insecticides in *Anopheles arabiensis* from  
366 Ethiopia, *Malar J* **18**:1–11, BioMed Central (2019).
- 367 12 Urabayala S, Kamaraju R, Tiwari SN, Sreedharan S, Ghosh SK, and Valecha N,  
368 Village-scale ( Phase III ) evaluation of the efficacy and residual activity of SumiShield  
369 50® WG ( Clothianidin 50 %, w/w ) for indoor spraying for the control of pyrethroid-  
370 resistant *Anopheles culicifacies* Giles in Karnataka state , India, *Trop Med Int Heal*  
371 **23**:605–615 (2018).
- 372 13 Agossa FR, Padonou GG, Fassinou AJYH, Odjo EM, Akuoko OK, Salako A, *et al.*,  
373 Small-scale field evaluation of the efficacy and residual effect of Fludora® Fusion  
374 (mixture of clothianidin and deltamethrin) against susceptible and resistant *Anopheles*  
375 *gambiae* populations from Benin, West Africa, *Malar J* **17**:484, BioMed Central  
376 (2018).
- 377 14 Kweka E, Mahande A, Ouma J, Msangi S, Karanja W, Temba V, *et al.*, Novel Indoor  
378 Residual Spray Insecticide With Extended Mortality Effect : A Case of SumiShield  
379 50WG Against Wild Resistant Populations of *Anopheles arabiensis* in Northern  
380 Tanzania, *Glob Heal Sci Pract* **6**:758–765 (2018).



- 381 15 Matsuda K, Ihara M, and Sattelle DB, Neonicotinoid insecticides: Molecular targets,  
382 resistance, and toxicity, *Annu Rev Pharmacol Toxicol* **60**:241–255 (2020).
- 383 16 Simon-delso N, Amaral-rogers V, Belzunces L, Bonmatin JM, Chagnon M, Downs C,  
384 *et al.*, Systemic insecticides (neonicotinoids and fipronil): trends , uses , mode of action  
385 and metabolites, *Environ Sci Pollut Res* **22**:5–34 (2015).
- 386 17 Katambo M, Neonicotinoids and their impact on ecosystem services in Tanzania, 2018.
- 387 18 Akpesse A, Neonicotinoids and their impact on ecosystem service for agriculture and  
388 biodiversity in Africa, 2018.
- 389 19 Ngamo Tinkeu L, Current situation on the registration and use of neonicotinoids in  
390 Cameroon, 2018.
- 391 20 R. Ramadevi RR, C. Ramachandraiah CR, and Reddy GVS, A Review on  
392 Contamination of Soil and Water by Neonicotinoid Pesticides and Trends it's in Soil  
393 and Water Samples with Chromatographic Analytical Techniques, *Orient J Chem*  
394 **38**:259–267 (2022).
- 395 21 Morrissey CA, Mineau P, Devries JH, Sanchez-Bayo F, Liess M, Cavallaro MC, *et al.*,  
396 Neonicotinoid contamination of global surface waters and associated risk to aquatic  
397 invertebrates: A review, *Environ Int* **74**:291–303, Elsevier Ltd (2015).
- 398 22 Mouhamadou CS, Souza SS De, Fodjo BK, Zoh MG, Bli NK, and Koudou BG,  
399 Evidence of insecticide resistance selection in wild *Anopheles coluzzii* mosquitoes due  
400 to agricultural pesticide use, *Infect Dis Poverty* **8**:1–8, Infectious Diseases of Poverty  
401 (2019).
- 402 23 Fouet C, Ashu FA, Ambadiang MM, Tchapgba W, Wondji CS, and Kamdem C,  
403 Resistance to clothianidin reduces the efficacy of SumiShield 50WG®, a neonicotinoid

- 404 formulation for indoor residual spraying, *bioRxiv* (2020).
- 405 24 Ambadiang MM, Fouet C, Ashu FA, Penlap-Beng V, and Kamdem C, Chronic  
406 exposure of mosquito larvae to pesticide residues endangers a new generation of  
407 agrochemicals repurposed for malaria prevention, *bioRxiv* (2023).
- 408 25 Ashu FA, Fouet C, Ambadiang MM, Penlap-Beng V, and Kamdem C, Vegetable oil  
409 surfactants are synergists that can bias neonicotinoid susceptibility testing in adult  
410 mosquitoes, *bioRxiv* (2023).
- 411 26 Prevention C for DC and, (2012).
- 412 27 Okolle NJ, Monono EY, and Tabikam, Amungwa Ivan Mambo, Stephania Kinge  
413 Magwell PFR, Insecticide Use and Application in Cameroon, *Insecticides*, IntechOpen  
414 (2022).
- 415 28 Agumba S, Gimnig JE, Ogonda L, Ombok M, Kosgei J, Munga S, *et al.*, Diagnostic  
416 dose determination and efficacy of chlorfenapyr and clothianidin insecticides against  
417 *Anopheles malaria* vector populations of western Kenya, *Malar J* **18**:1–9, BioMed  
418 Central (2019).
- 419 29 Corbel V, Kont MD, Ahumada ML, Andréo L, Bayili B, Bayili K, *et al.*, A new WHO  
420 bottle bioassay method to assess the susceptibility of mosquito vectors to public health  
421 insecticides: results from a WHO-coordinated multi-centre study, *Parasit Vectors*  
422 **16**:1–17, BioMed Central (2023).
- 423 30 Kamdem C, Tene Fossog B, Simard F, Etouna J, Ndo C, Kengne P, *et al.*,  
424 Anthropogenic Habitat Disturbance and Ecological Divergence between Incipient  
425 Species of the Malaria Mosquito *Anopheles gambiae*, *PLoS One* **7**:e39453 (2012).
- 426 31 Fanello C, Santolamazza F, and DellaTorre A, Simultaneous identification of species

- 427 and molecular forms of the *Anopheles gambiae* complex by PCR-RFLP, *Med Vet*  
428 *Entomol* **16**:461–464 (2002).
- 429 32 Abbott WS, A method for computing the effectiveness of an insecticide, *J Econ*  
430 *Entomol* **18**:265–267 (1925).
- 431 33 R Core Team, R: A language and environment for statistical computing, R Foundation  
432 for Statistical Computing, Vienna, Austria (2016).
- 433 34 World Health Organization (WHO), (2022).
- 434 35 Oxborough RM, Seyoum A, Yihdego Y, Dabire R, Gnanguenon V, Wat F, *et al.*,  
435 Susceptibility testing of *Anopheles malaria* vectors with the neonicotinoid insecticide  
436 clothianidin; results from 16 African countries, in preparation for indoor residual  
437 spraying with new insecticide formulations, *Malar J*  
438 **18**:<https://doi.org/10.1186/s12936-019-2888-6>, BioMed Central (2019).
- 439 36 Antonio-Nkondjio C, Keraf CH, Simard F, Awono-Ambene P, Chouaibou M,  
440 Tchuinkam T, *et al.*, Complexity of the malaria vectorial system in Cameroon:  
441 contribution of secondary vectors to malaria transmission., *J Med Entomol* **43**:1215–  
442 1221 (2006).
- 443 37 Stevenson J, St. Laurent B, Lobo NF, Cooke MK, Kahindi SC, Oriango RM, *et al.*,  
444 Novel vectors of malaria parasites in the western highlands of Kenya, *Emerg Infect Dis*  
445 **18**:1547–1549 (2012).
- 446 38 Costantini C, Ayala D, Guelbeogo WM, Pombi M, Some CY, Bassole IH, *et al.*, Living  
447 at the edge: biogeographic patterns of habitat segregation conform to speciation by  
448 niche expansion in *Anopheles gambiae*., *BMC Ecol* **9**:16 (2009).
- 449 39 Simard F, Ayala D, Kamdem GC, Pombi M, Etouna J, Ose K, *et al.*, Ecological niche

- 450 partitioning between *Anopheles gambiae* molecular forms in Cameroon: The ecological  
451 side of speciation, *BMC Ecol* **9** (2009).
- 452 40 Coetzee M and Koekemoer L, Molecular Systematics and Insecticide Resistance in the  
453 Major African Malaria Vector *Anopheles funestus*, *Annu Rev Entomol* (2013).
- 454 41 Tchouakui M, Assatse T, Mugenzi LMJ, Menze BD, Nguiffo-Nguete D, Tchapga W, *et*  
455 *al.*, Comparative study of the effect of solvents on the efficacy of neonicotinoid  
456 insecticides against malaria vector populations across Africa, *Infect Dis Poverty* **11**:1–  
457 9, BioMed Central (2022).
- 458 42 Puinean AM, Foster SP, Oliphant L, Denholm I, Field LM, Millar NS, *et al.*,  
459 Amplification of a cytochrome P450 gene is associated with resistance to neonicotinoid  
460 insecticides in the aphid *Myzus persicae*, *PLoS Genet* **6**:e1000999 (2010).
- 461 43 Nauen R, Bass C, Feyereisen R, and Vontas J, The Role of Cytochrome P450s in Insect  
462 Toxicology and Resistance, *Annu Rev Entomol* **67**:105–124 (2022).
- 463 44 Ullah F, Gul H, Tariq K, Desneux N, Gao X, and Song D, Functional analysis of  
464 cytochrome P450 genes linked with acetamiprid resistance in melon aphid, *Aphis*  
465 *gossypii*, *Pestic Biochem Physiol* **170**:104687, Elsevier (2020).
- 466 45 Samal RR, Panmei K, Lanbiliu P, and Kumar S, Reversion of CYP450  
467 monooxygenase-mediated acetamiprid larval resistance in dengue fever mosquito,  
468 *Aedes aegypti* L., *Bull Entomol Res* **112**:557–566 (2022).
- 469 46 Zhou C song, Cao Q, Li G zhi, and Ma D ying, Role of several cytochrome P450s in  
470 the resistance and cross-resistance against imidacloprid and acetamiprid of *Bemisia*  
471 *tabaci* (Hemiptera: Aleyrodidae) MEAM1 cryptic species in Xinjiang, China, *Pestic*  
472 *Biochem Physiol* **163**:209–215, Elsevier (2020).

473 47 Nauen R, Ebbinghaus-Kintscher U, Salgado VL, and Kausmann M, Thiamethoxam is  
474 a neonicotinoid precursor converted to clothianidin in insects and plants, *Pestic*  
475 *Biochem Physiol* 76:55–69 (2003).

476 **Figure legends**

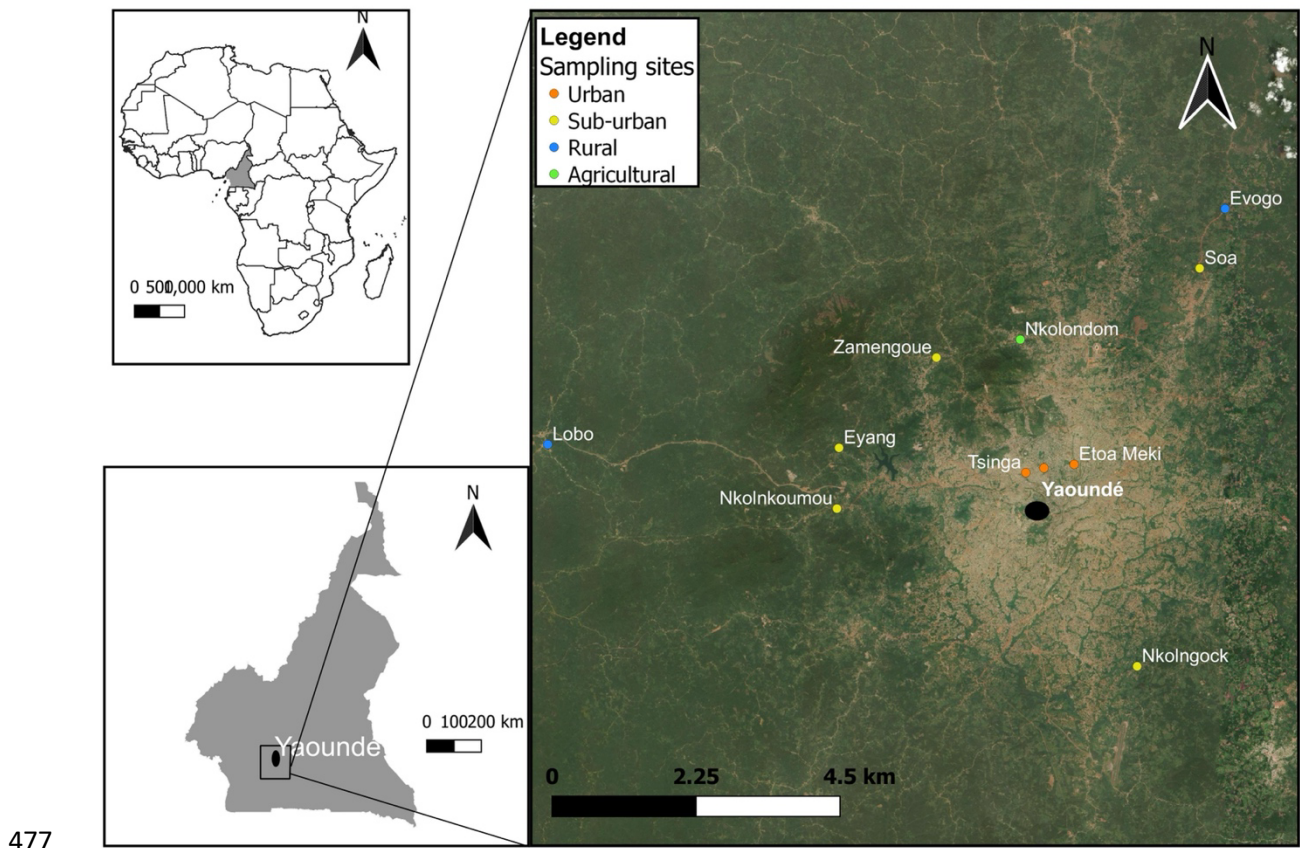

478 **Figure 1:** Map of the sampling sites where neonicotinoid susceptibility was monitored in *An.*  
479 *gambiae* and *An. coluzzii*.

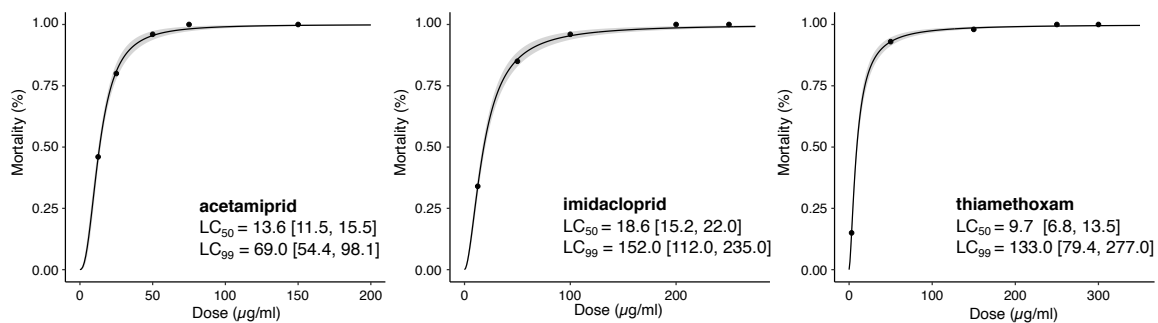

481 **Figure 2:** Dose-response curves with the standard error of the regression model (grey bands)  
482 representing the 24-h toxicity of three neonicotinoids in *Anopheles* mosquitoes. LC<sub>50</sub> and  
483 LC<sub>99</sub> with 95% confidence intervals of acetamiprid and imidacloprid were determined using  
484 the susceptible strain *An. gambiae* Kisumu while lethal concentrations of thiamethoxam were  
485 estimated against the *An. coluzzii* Ngousso strain.

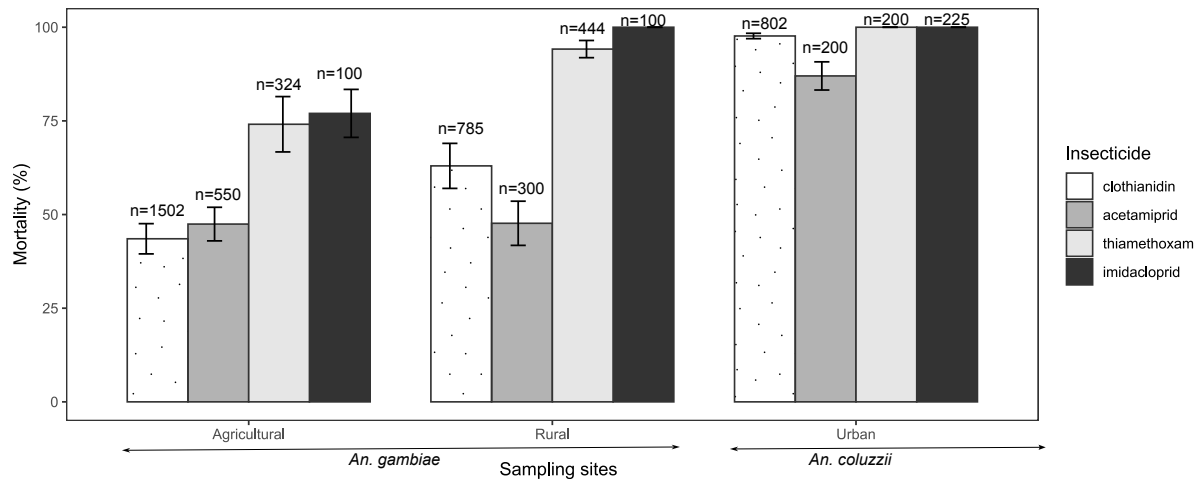

486

487 **Figure 3:** Baseline susceptibility of 5532 female adults of *An. gambiae* and *An. coluzzii* to  
488 four neonicotinoids obtained from pooled data representing 4 years of monitoring. Error bars  
489 indicate the standard error of the mean and (n) the number of mosquitoes tested.

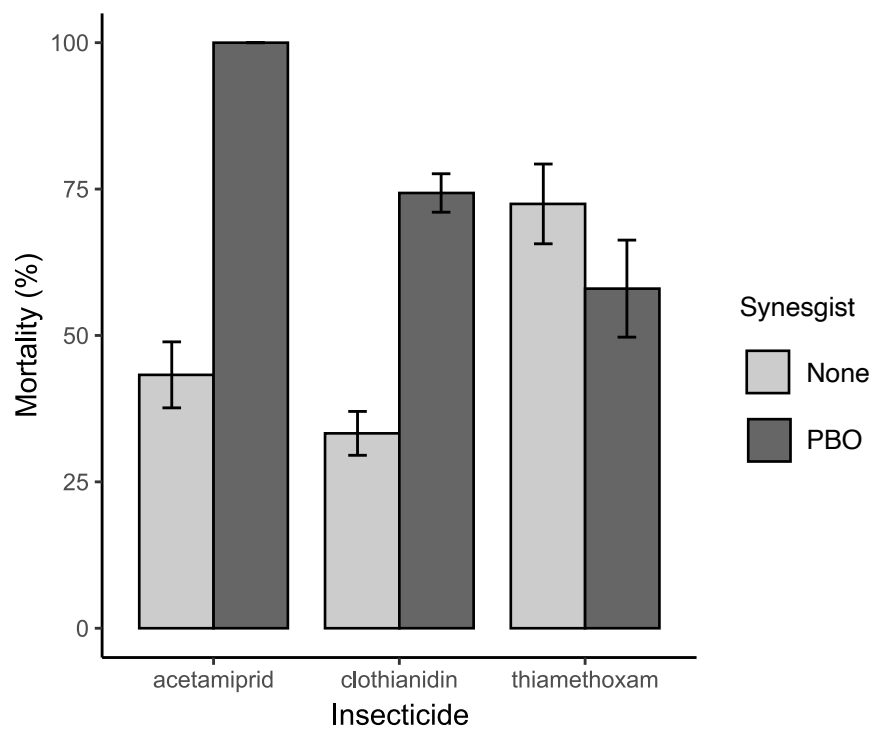

490

491 **Figure 4:** Effects of piperonyl butoxide (PBO) on the efficacy of three neonicotinoids against  
492 resistant *An. gambiae* mosquitoes.
